# Supplementary material for: Treatment with rGDF11 does not improve the dystrophic muscle pathology of mdx mice
Source: PubMed Central journal article supplement (PMC4906773; doi:10.1186/s13395-016-0092-8), 2016-06-14

# Additional File 1

**a**

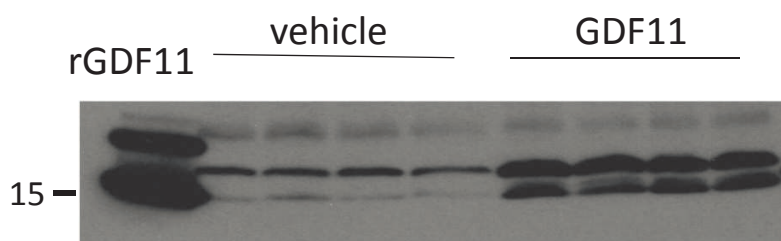

**b**

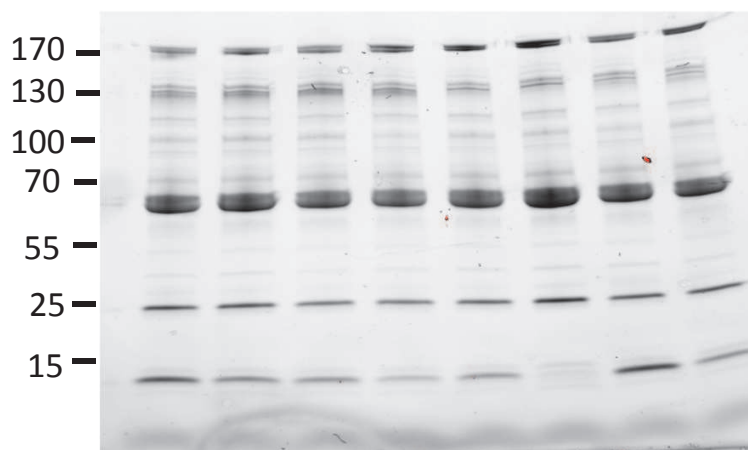

Supplement: 13395_2016_92_MOESM1_ESM.pdf [file 13395_2016_92_MOESM1_ESM.pdf]
